# Supplementary material for: Phenyl and thienyl functionalized imidazolium iodides for highly efficient quasi-solid-state dye-sensitized solar cells
Source: Royal Society of Chemistry journal article supplement (doi:10.1039/c7ta04717g), 2017-01-01
Supplement: c7ta04717g1.pdf [file c7ta04717g1.pdf]

## **Supplementary material for**

# **Phenyl and thienyl functionalized imidazolium iodide for highly efficient quasi-solid state dye-sensitized solar cells**

Meirong Zhang, Zhitong Jin, Chuanqi Feng, Min Wang, Zhong-Sheng Wang\*

*Department of Chemistry, Shanghai Key Laboratory of Molecular Catalysis and Innovative Materials, Lab of Advanced Materials, Collaborative Innovation Center of Chemistry for Energy Materials (2011-iChEM), Fudan University, Songhu Road 2205, 200438 Shanghai, P. R. China.*

\* Corresponding author. Tel & Fax: (+86)21-5163-0345, zs.wang@fudan.edu.cn.

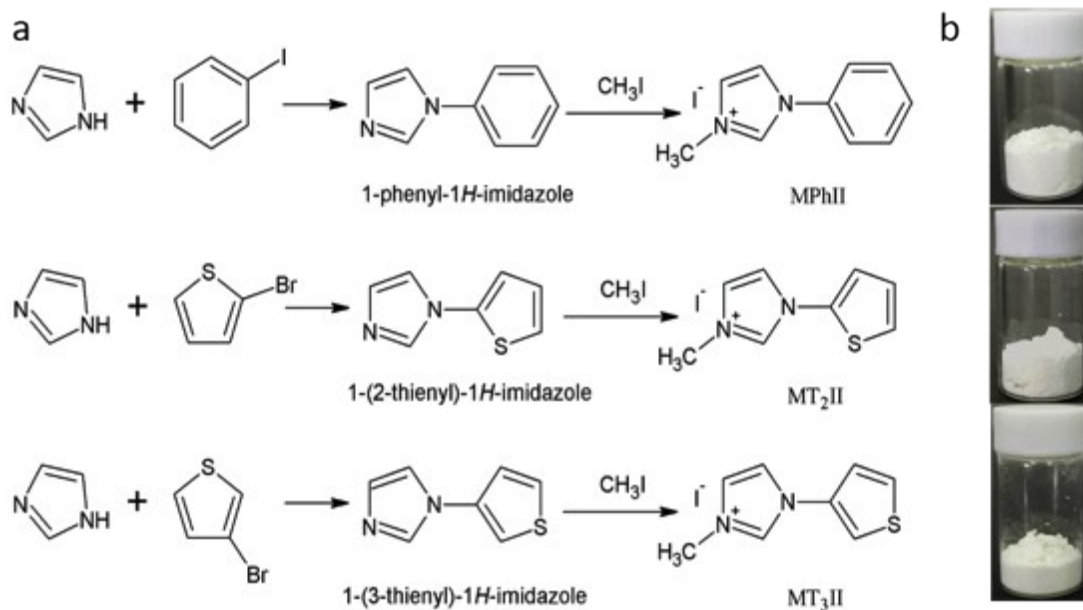

**Figure S1.** The synthetic route for the ionic conductors and their photographs.

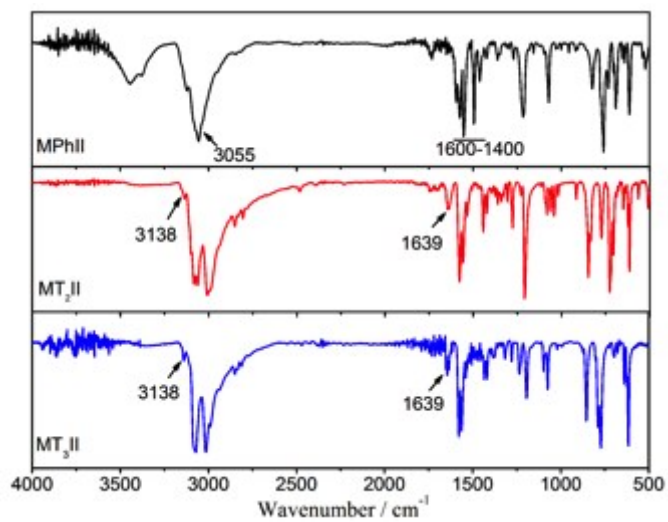

**Figure S2.** Fourier transform infrared spectra of the three ICs: MPhII, MT<sub>2</sub>II and MT<sub>3</sub>II.

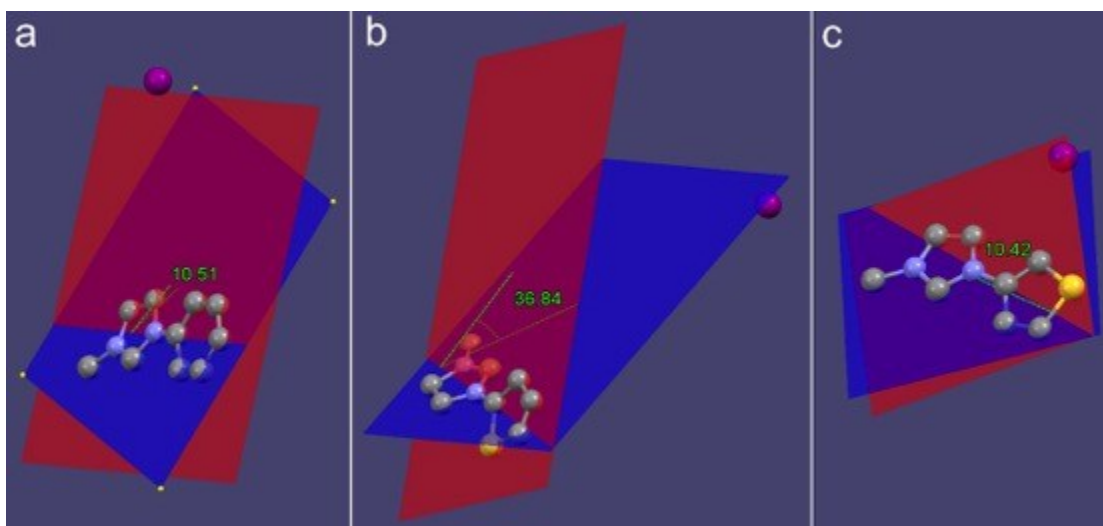

**Figure S3.** Dihedral angle of imidazolium cation of (a) MPhII, (b) MT<sub>2</sub>II, (c) MT<sub>3</sub>II.

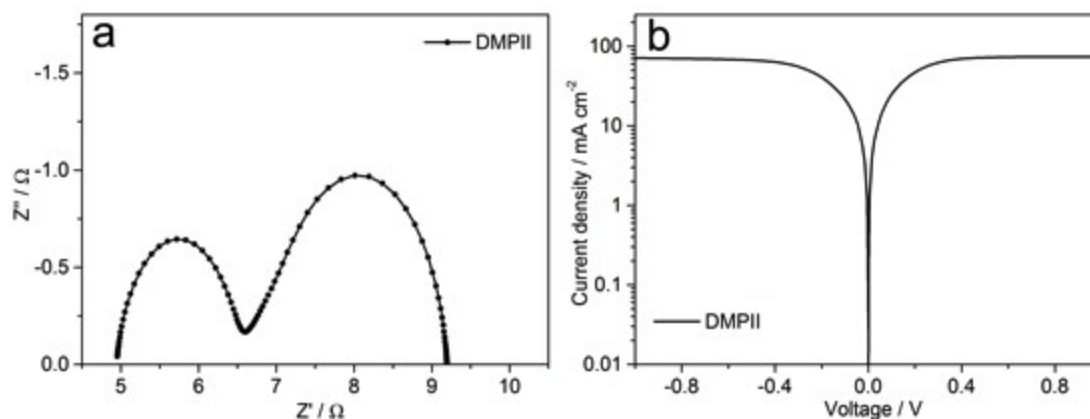

**Figure S4.** Electrochemical impedance spectroscopy and Tafel polarization curves of the quasi-solid-state electrolyte (QSS-DMPHII) containing DMPHII, I<sub>2</sub>, LiI, TBP (molar ratio, 12/1/2/10) and 4 wt% SiO<sub>2</sub> with 18% solvent of acetonitrile and methanol (1/1, v/v) sandwiched between two platinized FTO substrates.

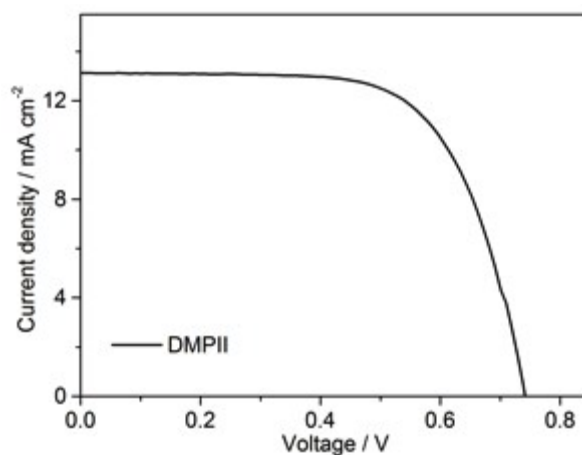

**Figure S5.** Photocurrent density-voltage characteristics of DSSC based on the QSS-DMPHII electrolyte.

**Table S1.** Crystallographic data (CCDC 1523312) and structural refinement for

## MPhII

| <b>Ionic conductor</b>            | <b>MPhII</b>                                                                           |
|-----------------------------------|----------------------------------------------------------------------------------------|
| Empirical formula                 | C <sub>10</sub> H <sub>11</sub> I N <sub>2</sub>                                       |
| Formula weight                    | 286.11                                                                                 |
| Temperature                       | 293(2) K                                                                               |
| Wavelength                        | 0.71073 Å                                                                              |
| Crystal system, space group       | Monoclinic, P2(1)/c                                                                    |
| Unit cell dimensions              | a = 8.2438(12) Å, b = 31.628(4) Å, c = 17.204(2) Å<br>α = 90°, β = 93.388(2)°, γ = 90° |
| Volume                            | 4477.7(11) Å <sup>3</sup>                                                              |
| Z                                 | 16                                                                                     |
| Calculated density                | 1.698 Mg/m <sup>3</sup>                                                                |
| Absorption coefficient            | 2.820 mm <sup>-1</sup>                                                                 |
| F(000)                            | 2208                                                                                   |
| Crystal size                      | 0.12 x 0.10 x 0.06 mm                                                                  |
| Theta range for data collection   | 1.35 to 25.10 °                                                                        |
| Limiting indices                  | -9 ≤ h ≤ 9, -30 ≤ k ≤ 37, -20 ≤ l ≤ 20                                                 |
| Reflections collected             | 26556                                                                                  |
| Unique                            | 7940 [R(int) = 0.0458]                                                                 |
| Completeness to theta = 25.10     | 99.7 %                                                                                 |
| Absorption correction             | None                                                                                   |
| Max. and min. transmission        | 0.8490 and 0.7284                                                                      |
| Refinement method                 | Full-matrix least-squares on F <sup>2</sup>                                            |
| Data / restraints / parameters    | 7940 / 0 / 473                                                                         |
| Goodness-of-fit on F <sup>2</sup> | 1.108                                                                                  |
| Final R indices [I > 2σ(I)]       | R1 = 0.0699, wR2 = 0.1785                                                              |
| R indices (all data)              | R1 = 0.0990, wR2 = 0.1900                                                              |
| Largest diff. peak and hole       | 0.930 and -1.498 e.Å <sup>-3</sup>                                                     |

**Table S2.** Crystallographic data (CCDC 1523955) and structural refinement for

MT<sub>2</sub>II

| <b>Ionic conductor</b>             | MT <sub>2</sub> II                                                               |
|------------------------------------|----------------------------------------------------------------------------------|
| Empirical formula                  | C <sub>8</sub> H <sub>9</sub> IN <sub>2</sub> S                                  |
| Formula weight                     | 292.13                                                                           |
| Temperature                        | 223(2) K                                                                         |
| Wavelength                         | 0.71073 Å                                                                        |
| Crystal system, space group        | Orthorhombic, Pna21                                                              |
| Unit cell dimensions               | a = 18.903(10) Å, b = 6.311(3) Å, c = 17.950(9) Å,<br>α = 90°, β = 90°, γ = 90°. |
| Volume                             | 2141.3(19) Å <sup>3</sup>                                                        |
| Z                                  | 8                                                                                |
| Density (calculated)               | 1.812 Mg/m <sup>3</sup>                                                          |
| Absorption coefficient             | 3.138 mm <sup>-1</sup>                                                           |
| F(000)                             | 1120                                                                             |
| Crystal size                       | 0.730 x 0.280 x 0.200 mm <sup>3</sup>                                            |
| Theta range for data collection    | 2.269 to 27.526°.                                                                |
| Index ranges                       | -24 ≤ h ≤ 16, -7 ≤ k ≤ 8, -22 ≤ l ≤ 23                                           |
| Reflections collected              | 14462                                                                            |
| Independent reflections            | 4864 [R(int) = 0.0349]                                                           |
| Completeness to theta =<br>25.242° | 99.8 %                                                                           |
| Absorption correction              | Semi-empirical from equivalents                                                  |
| Max. and min. transmission         | 0.647 and 0.328                                                                  |
| Refinement method                  | Full-matrix least-squares on F <sup>2</sup>                                      |
| Data / restraints / parameters     | 4864 / 22 / 238                                                                  |
| Goodness-of-fit on F <sup>2</sup>  | 1.122                                                                            |
| Final R indices [I > 2σ(I)]        | R1 = 0.0419, wR2 = 0.1077                                                        |
| R indices (all data)               | R1 = 0.0470, wR2 = 0.1118                                                        |
| Extinction coefficient             | 0.0025(4)                                                                        |
| Largest diff. peak and hole        | 1.093 and -1.259 e.Å <sup>-3</sup>                                               |

**Table S3.** Crystallographic data (CCDC 1517957) and structural refinement for

MT<sub>3</sub>II

| <b>Ionic conductor</b>            | MT <sub>3</sub> II                                                          |
|-----------------------------------|-----------------------------------------------------------------------------|
| Empirical formula                 | C <sub>8</sub> H <sub>9</sub> IN <sub>2</sub> S                             |
| Formula weight                    | 292.13                                                                      |
| Temperature                       | 173(2) K                                                                    |
| Wavelength                        | 0.71073 Å                                                                   |
| Crystal system, space group       | Orthorhombic, Pca21                                                         |
| Unit cell dimensions              | a = 19.028(6) Å, b = 7.932(3) Å, c = 13.915(5) Å, α = 90°, β = 90°, γ = 90° |
| Volume                            | 2100.1(13) Å <sup>3</sup>                                                   |
| Z                                 | 8                                                                           |
| Density (calculated)              | 1.848 Mg/m <sup>3</sup>                                                     |
| Absorption coefficient            | 3.199 mm <sup>-1</sup>                                                      |
| F(000)                            | 1120                                                                        |
| Crystal size                      | 0.470 x 0.430 x 0.290 mm <sup>3</sup>                                       |
| Theta range for data collection   | 2.141 to 27.511°.                                                           |
| Index ranges                      | -18 ≤ h ≤ 24, -10 ≤ k ≤ 10, -18 ≤ l ≤ 17                                    |
| Reflections collected             | 14077                                                                       |
| Independent reflections           | 4498 [R(int) = 0.0411]                                                      |
| Completeness to theta = 25.242°   | 99.30%                                                                      |
| Absorption correction             | Semi-empirical from equivalents                                             |
| Max. and min. transmission        | 0.430 and 0.192                                                             |
| Refinement method                 | Full-matrix least-squares on F <sup>2</sup>                                 |
| Data / restraints / parameters    | 4498 / 10 / 224                                                             |
| Goodness-of-fit on F <sup>2</sup> | 1.091                                                                       |
| Final R indices [I > 2σ(I)]       | R1 = 0.0300, wR2 = 0.0842                                                   |
| R indices (all data)              | R1 = 0.0340, wR2 = 0.0866                                                   |
| Absolute structure parameter      | 0.03(2)                                                                     |
| Extinction coefficient            | 0.0059(5)                                                                   |
| Largest diff. peak and hole       | 1.093 and -0.633 e.Å <sup>-3</sup>                                          |
